picture(0,0)(-35,0)(1,0)30 (0,35)(0,-1)30 picture

picture(0,0)(35,0)(-1,0)30 (0,35)(0,-1)30 picture

Bioinformatics  
doi.10.1093/bioinformatics/xxxxx  
Advance Access Publication Date: Day Month Year  
Regulatory and Functional Genomics

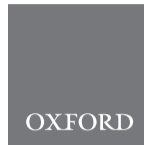

Regulatory and Functional Genomics

# reComBat: batch-effect removal in large-scale multi-source gene-expression data integration

Michael F. Adamer<sup>1,2,\*,+</sup>, Sarah C. Brüningk<sup>1,2,+</sup>, Alejandro Tejada-Arranz<sup>3</sup>, Fabienne Estermann<sup>3</sup>, Marek Basler<sup>3</sup> and Karsten Borgwardt<sup>1,2</sup>

<sup>1</sup>Machine Learning & Computational Biology Lab, Department of Biosystems Science and Engineering, ETH Zurich, Basel, Switzerland

<sup>2</sup>Swiss Institute for Bioinformatics (SIB), Lausanne, Switzerland

<sup>3</sup>Biozentrum, University of Basel, Basel, Switzerland

\*To whom correspondence should be addressed.+ These authors share first authorship

Associate Editor: XXXXXXXX

Received on XXXXX; revised on XXXXX; accepted on XXXXX

## Abstract

**Motivation:** With the steadily increasing abundance of omics data produced all over the world under vastly different experimental conditions residing in public databases, a crucial step in many data-driven bioinformatics applications is that of data integration. The challenge of batch-effect removal for entire databases lies in the large number of batches and biological variation which can result in design matrix singularity. This problem can currently not be solved satisfactorily by any common batch-correction algorithm.

**Results:** We present *reComBat*, a regularized version of the empirical Bayes method to overcome this limitation and benchmark it against popular approaches for the harmonization of public gene expression data (both microarray and bulkRNAsq) of the human opportunistic pathogen *Pseudomonas aeruginosa*. Batch-effects are successfully mitigated while biologically meaningful gene expression variation is retained. *reComBat* fills the gap in batch-correction approaches applicable to large-scale, public omics databases and opens up new avenues for data-driven analysis of complex biological processes beyond the scope of a single study.

**Contact:** michael.adamer@bsse.ethz.ch

**Availability:** The code is available at <https://github.com/BorgwardtLab/reComBat>, all data and evaluation code can be found at <https://github.com/BorgwardtLab/batchCorrectionPublicData>

## 1 Introduction

Data-driven computational biology greatly depends on the availability of large, integrated data-sets to provide the necessary variety and statistical power for state-of-the-art (SOTA) machine and deep learning, as recently demonstrated by Alpha-Fold (Jumper *et al.*, 2021). In particular, an in-depth understanding of general trends in expression and transcription profiles are key for important research questions such as overcoming microbial antibiotic resistance, (Gil-Gil *et al.*, 2021; Andersson *et al.*, 2020) or cancer therapy failure (Kourou *et al.*, 2021; Malod-Dognin *et al.*, 2019). By mining large databases across studies, it may be possible to identify novel biological mechanisms that cannot be found by studying individual, small-scale experiments alone. This poses a problem shift

towards the need for integrating diverse data obtained from numerous independent experiments.

Public databases such as the Gene Expression Omnibus (GEO) (Barrett *et al.*, 2013; Edgar *et al.*, 2002), include independent studies collected over a large time span, under different biological and technical conditions. Hence, strong batch-effects (i.e. unwanted and biologically irrelevant variation) preclude a comprehensive analysis of pooled data and first need to be mitigated while desired biological variation (referred to in this paper as “(experimental) design”) needs be retained.

Although a range of batch-correction algorithms has previously been suggested (Tran *et al.*, 2020; Lazar *et al.*, 2012; Rong *et al.*, 2020; Chazarra-Gil *et al.*, 2021), only a small subset of these remains applicable for this large-scale setting. In particular, most previous algorithms cannot incorporate high-dimensional experimental design information. Our goal for this study is to provide the community with a simple, yet effective

© The Author

1

picture(0,0)(-35,0)(1,0)30 (0,-35)(0,1)30 picture

picture(0,0)(35,0)(-1,0)30 (0,-35)(0,1)30 picture

picture(0,0)(-35,0)(1,0)30 (0,35)(0,-1)30 picture

picture(0,0)(35,0)(-1,0)30 (0,35)(0,-1)30 picture

28 extension of the popular and computationally efficient empirical Bayes 89  
29 method (Johnson *et al.*, 2006) (ComBat) to account for a large amount 90  
30 of highly correlated biological covariates. ComBat is based on ordinary 91  
31 linear regression and, therefore, will fail if the system is underdetermined. 92

32 We benchmark our method on simulated data and provide a real-world 93  
33 application in microarray and bulk RNAseq data, evaluating the impact 94  
34 of culture conditions on the gene expression profiles of *Pseudomonas* 95  
35 *aeruginosa* (PA). PA is a Gram-negative bacterium with a large genome 96  
36 (Stover *et al.*, 2000) that thrives in a variety of environments and has 97  
37 been declared a critical priority pathogen for the development of new 98  
38 antimicrobial treatments (Tacconelli *et al.*, 2018). A large range of studies 99  
39 have previously investigated the impact of culture conditions on the gene 100  
40 expression profiles of PA. A comprehensive review of the perturbations 101  
41 caused by the microenvironmental cues is missing as a consequence of the 102  
42 lack of harmonized data allowing for a direct comparison. 103

43 The paper is organized as follows. After reviewing relevant literature 104  
44 in Section 1.1 we introduce our *reComBat* algorithm (contribution i) in 105  
45 Section 2 as an extension of the ComBat algorithm to handle highly 106  
46 correlated covariates. In the second part of Section 2 we address the 107  
47 issue of assessing the efficacy of the batch-correction by introducing 108  
48 a large variety of evaluation metrics (contribution ii). In Section 3 109  
49 we benchmark *reComBat* against a selection of SOTA batch-correction 110  
50 methods on simulated and real-world data. Finally, we present a large, 111  
51 harmonized data-set of PA expression profiles in response to different 112  
52 microenvironmental cues (contribution iii). We conclude Section 3 by 113  
53 demonstrating, as a proof of concept, the biological validity of the 114  
54 harmonized data-set. Section 4 comprises of a discussion and outlook. 115

## 1.1 Related Work 114

55 A variety of batch-correction methods has previously been suggested for 115  
56 bulk and single cell sequencing data (see e.g. (Lazar *et al.*, 2012; Tran 116  
57 *et al.*, 2020; Yu *et al.*, 2021)). Here, we focus on batch-correction of bulk 117  
58 data which can generally be divided into the following categories: 118

59 **Normalization to reference genes or samples:** Algorithms, such as 119  
60 cross-platform normalization (Shabalina *et al.*, 2008) or reference scaling 120  
61 (Kim *et al.*, 2007), which employ references, are infeasible in the public 121  
62 data domain: “reference” or “house keeping” genes don’t exist for some 122  
63 organisms, particularly microbes, eliminating these as common ground for 123  
64 batch-effect correction. Given a large public data-set, overlapping samples 124  
65 or common reference experiments are unlikely. 125

66 **Discretization methods:** Approaches that discretize expression data 126  
67 into categories (e.g., “expressed” vs. “not expressed”) can be hard 127  
68 to implement rigorously without a relevant control. Furthermore, the 128  
69 information loss due to discretization may affect the results of any advanced 129  
70 downstream analysis of the harmonized data. 130

71 **Location-scale adjustments:** These methods adjust the mean and/or 131  
72 variance of the genes, e.g. by standardization (Li and Wong, 2001) 132  
73 or batch mean-centering (Sims *et al.*, 2008). This only works if the 133  
74 batch-effect is a simple mean/variance shift and does not account for 134  
75 additional confounders. One of the most popular location-scale method 135  
76 is the empirical Bayes algorithm, ComBat (Johnson *et al.*, 2006). Despite 136  
77 reasonable success for the correction of local, i.e. within one experiment, or 137  
78 moderate (i.e. comprising few, biologically correlated) batch-effects most 138  
79 location-scale adjustment methods either provide insufficient correction in 139  
80 the presence of strong batch-effects (e.g. standardization) or are unable to 140  
81 account for highly correlated design features (e.g. ComBat). 141

82 **Matrix factorization:** This approach builds on decomposition such 142  
83 as principal component analysis (PCA) or singular value decomposition 143  
84 (SVD) (Alter *et al.*, 2000) to identify and remove factors characterizing 144  
85 the batch. While this can work in small scale experiments, it is unclear 145  
86 how to apply these methods when there is strong confounding of batch 146  
87 and biological variation. A tangential approach to matrix factorization is 147

to estimate unwanted variation via surrogate variables (SVA) (Lazar *et al.*, 2012). Since in our setting we assume that we know all sources of variation, we do not consider SVA.

**Deep learning based:** Recently, nonlinear models, often based on neural/variational autoencoders or generative adversarial networks (GAN), have gained popularity (e.g. normAE (Rong *et al.*, 2020), AD-AE (Dincer *et al.*, 2020), scGen (Lotfollahi *et al.*, 2019), (Ghahramani *et al.*, 2018)). This class of models aims to find a batch-effect-free latent space representation of the data e.g. via adversarial training. While an advantage of these methods is their flexibility to account for batches, but also desired biological variation, a major drawback may be that the batch-effect is only removed in a low-dimensional latent space. Downstream analysis is necessarily constrained (Dincer *et al.*, 2020; Rong *et al.*, 2020). scGen is a notable exception as it provides a direct normalization at gene expression level. However, large data-sets are required and, in the absence of ground truth, the risk of overcorrection should be considered in addition to increased computational complexity.

## 2 Approach 114

115 In this section we introduce the mathematical tools and start by defining 116  
117 our modification to the popular ComBat algorithm, *reComBat*, before 118  
119 introducing a range of possible evaluation metrics to gauge the efficacy of 120  
121 data harmonization. 122

### 2.1 Classical: ComBat 123

124 ComBat (Johnson *et al.*, 2006) is a well-established batch-correction 125  
126 algorithm employing a three-step process. 127

1. The gene expressions are estimated via an ordinary linear regression and the data is standardized.
2. The adjustment parameters are found by empirical Bayes estimates of parametric or non-parametric priors.
3. The standardized data is adjusted to remove the batch-effect.

The ComBat algorithm has seen many refinements and applications (see e.g. (Čuklina *et al.*, 2021; Müller *et al.*, 2016; Zhang *et al.*, 2020)). However, most data-sets have still been small and did not come with an extensive design matrix. When the design matrix becomes large (many covariates) and sparse, unexpected issues can arise in step 1 of the algorithm. To illustrate the classic algorithm, we use the slightly modified ansatz of (Wachinger *et al.*, 2021),

$$Y_{ijk} = \underbrace{(X\beta^x)_{jk}}_{\text{desired variation}} + \underbrace{(C\beta^c)_{jk}}_{\text{undesired variation}} + \underbrace{\alpha_k}_{\text{regression intercept}} + \underbrace{\beta_{ik}^g}_{\text{additive batch-effect}} + \underbrace{\delta_{ik}\epsilon_{ijk}}_{\text{multiplicative batch-effect}}, \quad (1)$$

where  $Y_{ijk}$  is the gene expression of the  $k^{\text{th}}$  gene in the  $j^{\text{th}}$  sample of the  $i^{\text{th}}$  batch. The matrices  $X$  and  $C$  are design matrices of desired and undesired variation with their corresponding matrices of regression coefficients  $\beta^x$  and  $\beta^c$ .  $\alpha$  is a matrix of intercepts, and  $\beta^g$  and  $\delta$  parameterize the *additive* and *multiplicative* batch-effects. The tensor  $\epsilon$  is a three-dimensional tensor of standard Gaussian random variables. Note, that we implicitly encode batch- and sample-dependency by dropping the relevant indices, i.e.  $\beta^g$  depends on the batch and gene, but is constant for each sample within the batch.

In the first step of the algorithm the parameters  $\beta^x$ ,  $\beta^c$ , and  $\alpha$  are fitted via an ordinary linear regression on

$$Y = X\beta^x + C\beta^c + \alpha = \tilde{X}\beta, \quad (2)$$

where  $\tilde{X} \in \mathbb{R}^{n \times m}$ , where  $m$  is the number of features and  $n$  is the number of samples. Note, that this formulation is equivalent to redefining  $Y \in \mathbb{R}^{n \times g}$ , where  $g$  is the number of genes, and subsuming the batch and  $C$  features into  $\tilde{X}$ . The intercept  $\alpha$  is inferred via the relation

picture(0,0)(-35,0)(1,0)30 (0,-35)(0,1)30 picture

picture(0,0)(35,0)(-1,0)30 (0,-35)(0,1)30 picture

picture(0,0)(-35,0)(1,0)30 (0,35)(0,-1)30 picture

picture(0,0)(35,0)(-1,0)30 (0,35)(0,-1)30 picture

135  $\frac{1}{N} \sum_i n_i \beta_{ik}^g = 0$  (Johnson *et al.*, 2006), where  $n_i$  is the number of  
136 samples in batch  $i$ ,  $\beta_{ik}$  is the regression coefficient of batch  $i$  for gene  $k$   
137 and  $N$  is the total number of samples. For ease of notation, in the remainder  
138 of this paper we will use this equivalent formulation.

139 Once, the model is fitted, the data is standardized, then the batch-effect  
140 parameters,  $\hat{\gamma}$  and  $\hat{\delta}$  are estimated using a parametric or non-parametric  
141 empirical Bayes method. Finally, the data is adjusted. For details, please  
142 refer to the original publication (Johnson *et al.*, 2006).

## 143 2.2 Novel contribution: reComBat

144 **Problem statement:** Using standard results for ordinary linear regression,  
145 we know that if the matrix  $A = \tilde{X}^T \tilde{X}$  is positive-definite, the  
146 optimization of (2) is strictly convex. However, if  $A$  is singular a unique-  
147 solution the the regression does not exist. Hence, if  $A$  is rank-deficient,  
148 i.e. the system is underdetermined, ComBat will not necessarily arrive at  
149 a unique solution. Our goal in this work is to provide a computationally  
150 efficient solution for this problem to make the empirical Bayes method  
151 applicable also to large-scale public data harmonization.

152 Given the popularity of ComBat this issue does not seem to be  
153 encountered frequently. One possible explanation is that the sources of  
154 biological variation that are usually considered within the same experiment  
155 are limited and well-chosen. When integrating entire databases, however,  
156 the sources of biological variation are manifold and these can often only be  
157 encoded as categorical variables. One prominent example is considering  
158 all uploaded experimental data of a particular pathogen, which can result  
159 in hundreds of unique experimental conditions, some potentially highly  
160 correlated with other metadata. Encoding these as one-hot categorical  
161 variables creates a sparse, high-dimensional feature vector and, when  
162 many such categorical features are considered, then  $m \approx n$ . If, either  
163  $m > n$ , or strong batch-design correlations exist, then, even for large-scale  
164 integration,  $A$  may be rank deficient.

To mitigate this issue, we propose a modification of the estimation of  
gene expression profiles by a linear model (step 1 of the ComBat algorithm)  
by fitting the elastic net model - a standard approach from linear regression  
theory

$$\hat{Y} = X\hat{\beta}^x + C\hat{\beta}^c + \hat{\alpha}, \quad (3)$$

$$\hat{\beta}^x, \hat{\beta}^c, \hat{\alpha} = \underset{\beta^x, \beta^c, \alpha}{\operatorname{argmin}} \left[ \|Y - \hat{Y}\|_2^2 + \lambda_1 (\|\beta^x\|_1 + \|\beta^c\|_1) \right] \quad (4)$$

$$+ \lambda_2 (\|\beta^x\|_2^2 + \|\beta^c\|_2^2), \quad (5)$$

165 where  $\|\cdot\|_p$  denotes the  $\ell_p$  norm, and  $\lambda_1$  and  $\lambda_2$  are the LASSO and  
166 ridge regularization penalties. Due to this regularizing modification of the  
167 algorithm we call our approach **regularized-ComBat**, in short *reComBat*.  
168 Both, parameter fitting using the Empirical Bayes methods, and parameter  
169 adjustment on the standardized data follow the above outline for the  
170 ComBat algorithm. Note that *reComBat* essentially replaces a linear  
171 regression with a regularized regression and, hence, the increase of  
172 computational complexity of *reComBat* over ComBat is negligible.

173 The *reComBat* algorithm can be summarized in the following pseudo-  
code.

### Algorithm 1 reComBat

**Require:** The data and the design:  $Y, \tilde{X}$   
1: Fit a regularized linear model:  $Y = \tilde{X}\beta$   
2: Standardize  $Y$   
3: Obtain empirical Bayes estimates  
4: Rescale  $Y$ :  $Y \rightarrow \tilde{Y}$   
**Output:** The corrected data:  $\tilde{Y}$

174

## 2.3 Evaluation metrics

A detailed description and definition of all evaluation metrics employed  
to score batch correction efficacy is provided in supplement A. We  
included classifier-based (logistic regression-based balanced accuracy  
and F1-score, Linear Discriminant Analysis (LDA) score), cluster-based  
(minimum separation number, cluster purity, Gini impurity), and sample  
distance-based (Distance Ratio Score (DRS), Shannon entropy) metrics.

## 3 Experiments

In this section, we apply *reComBat* to simulated and real-world microarray  
and bulkRNAsq data. We show quantitatively and qualitatively that  
*reComBat* is successful in removing substantial batch-effects while  
retaining biologically meaningful signal.

### 3.1 Experimental data

A detailed description is given in supplement B. We first evaluate the  
approaches on synthetic data with singular design matrix and test a range  
of hyperparameter combinations for data generation (number of samples  
(100-2000), batches (3-100), design matrix features (3-20), relative  
disturbance size of metadata to batch (0.01-20), number of Zero-Hops (5-  
40)) and score run time, LDA score, Shannon entropy and cluster purity as  
a function thereof w.r.t. the ground truth. Additionally, data for 887 (114  
batches, 39 Zero-Hops, see Table S1) microarray and 340 bulkRNAsq  
samples (32 batches, 12 Zero-Hops, see Table S2) was collected from the  
GEO, SRA and ENA data bases (Barrett *et al.*, 2013) with relevant metadata  
characterizing experimental design (culture conditions, PA strain). The  
obtained microarray design matrix is singular, whereas the RNA design  
matrix is not-singular, however, ill-conditioned.

### 3.2 Batch-correction methods

We tested our approach against a representative sample of baseline  
methods, in particular, standardization, marker gene elimination, principal  
component elimination, ComBat, Harmony (Korsunsky *et al.*, 2019) and  
scGen. Details on these methods can be found in the supplement C.

For *reComBat*, we used parametric priors for the empirical Bayes  
optimization and tested a variety of parameters including pure LASSO  
( $\lambda_2 = 0$ ), pure ridge ( $\lambda_1 = 0$ ), and the full elastic net  
regression. The range of regularization strengths tested were all possible  
combinations (except for (0,0)) of  $\lambda_1 \in \{0, 10^{-2}, 10^{-1}, 1\}$  and  
 $\lambda_2 \in \{0, 10^{-10}, \dots, 10^{-1}, 1\}$ . Note that smaller values of  $\lambda_1$  yielded  
numerical instabilities.

### 3.3 Hyperparameter optimization results

A hyperparameter screen to optimize regularization strength and type  
on the default simulated, microarray and bulkRNAsq data yielded best  
results when ridge regression was used ( $\lambda_1 = 0$ ) with  $\lambda_2 \leq 0.001$  (see  
supplement D). The specific regularization parameter only had a minor  
influence and we continued with  $\lambda_2 = 10^{-9}$ . We observe that stronger,  
particularly LASSO, regularization achieves superior batch heterogeneity  
at the cost of decrease in Zero-Hop uniformity in real-world data. Notice  
that LASSO-*reComBat* performs implicit feature selection due the  $\ell_1$   
regularization. This could hint to the fact that more balanced feature  
weighting (as provided by ridge-*reComBat*) is beneficial. In the following  
we present results only for ridge *reComBat*.

### 3.4 Evaluation on synthetic data

We benchmark *reComBat* on simulated data against popular batch-  
correction methods. Figure 1 A,B shows the simulated ground truth  
distribution together with the distribution after applying batch-effects, and

picture(0,0)(-35,0)(1,0)30 (0,-35)(0,1)30 picture

picture(0,0)(35,0)(-1,0)30 (0,-35)(0,1)30 picture

picture(0,0)(-35,0)(1,0)30 (0,35)(0,-1)30 picture

picture(0,0)(35,0)(-1,0)30 (0,35)(0,-1)30 picture

4

Adamer & Brüningk et al.

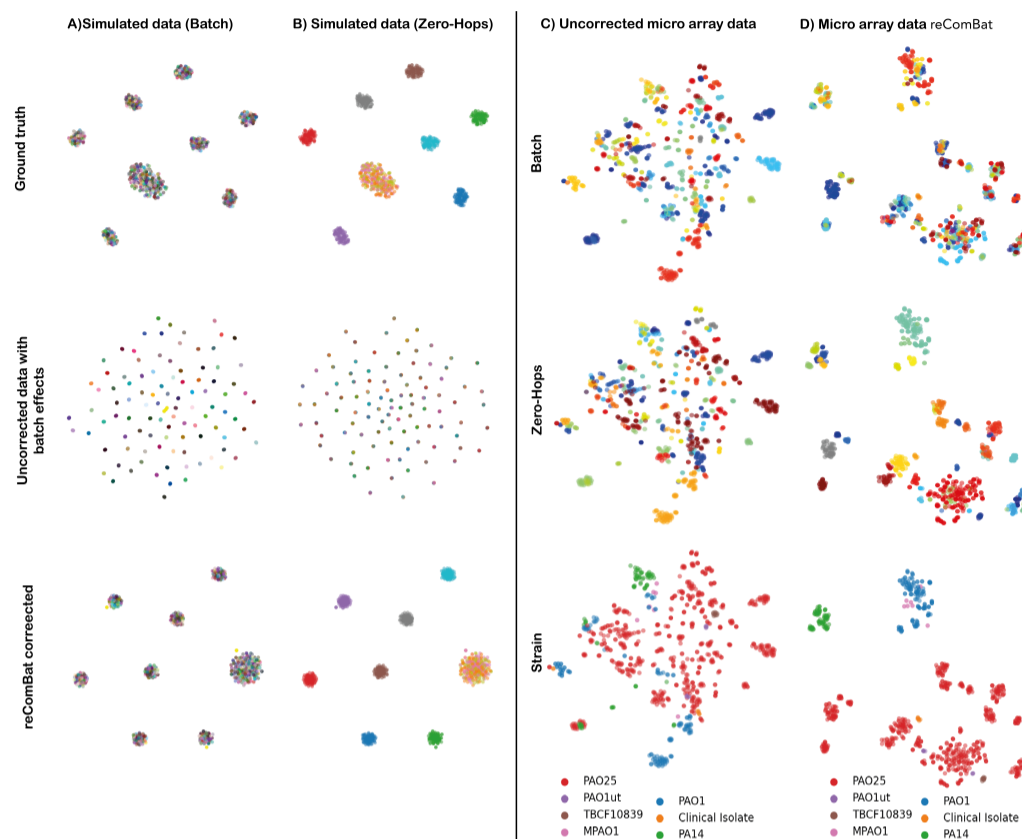

**Fig. 1.** t-SNE plots of the simulated (A, B) and microarray (C, D) data-sets. For simulated data we show ground truth (top), uncorrected (middle) and reComBat ( $\lambda_1 = 0, \lambda_2 = 10^{-9}$ ) corrected (bottom) results. (Un)Corrected microarray data are colored by batches (top), Zero-Hops (middle), and microbial strain (bottom). Color scales do not reflect proximity of the relevant batches or Zero-Hops.

229 following data harmonization with *reComBat*. The ground truth results<sup>256</sup>  
 230 in terms of Zero-Hop clusters were qualitatively well reproduced by<sup>257</sup>  
 231 *reComBat*. Quantitative results in terms of LDA score difference to ground<sup>258</sup>  
 232 truth (see supplement E for Shannon entropy, Gini impurity and cluster<sup>259</sup>  
 233 purity) are shown in Figure 2A as a function of different data generation<sup>260</sup>  
 234 hyperparameters for the investigated correction methods. We observe that<sup>261</sup>  
 235 *reComBat* and scGen outperform Harmony and simple correction (PC or<sup>262</sup>  
 236 marker gene elimination, standardization). Notably, if scGen is trained<sup>263</sup>  
 237 with Zero-Hop labels its performance is greatly improved, however, also<sup>264</sup>  
 238 prone to overfitting (positive LDA score differences). We only observe<sup>265</sup>  
 239 degradation of *reComBat* performance for smaller data-sets of 100 samples<sup>266</sup>  
 240 (given 10 Zero-Hops). Run time was generally very quick and favorable<sup>267</sup>  
 241 for *reComBat* compared to Harmony, or scGen (trained on GPU).<sup>268</sup>

### 3.5 Experimental benchmarking of *reComBat*

242  
 243 We show quantitatively and qualitatively that *reComBat* is successful in<sup>271</sup>  
 244 removing substantial batch-effects while retaining biologically meaningful<sup>272</sup>  
 245 signal in real-world data, too. Figure 1 C,D gives an overview of the<sup>273</sup>  
 246 uncorrected and *reComBat* corrected microarray data colored by batch,<sup>274</sup>  
 247 Zero-Hops, and microbial strain. Uncorrected data clusters by batch,<sup>275</sup>  
 248 indicating the presence of batch-effects, whereas clustering by biologically<sup>276</sup>  
 249 meaningful variation (e.g. by strain or Zero-Hop) is observed after<sup>277</sup>  
 250 correction. Additional overviews of t-SNE embeddings of batch-corrected<sup>278</sup>  
 251 expression data for all baseline models and data, colored by all design<sup>279</sup>  
 252 matrix elements are provided in supplement F.<sup>280</sup>

253 We compared our baselines to the best performing *reComBat* model<sup>281</sup>  
 254 based on all evaluation metrics (supplement C) in Figure 2B. In terms<sup>282</sup>  
 255 of gauging the metrics themselves for the ability to detect batch-effects,

we conclude that classifier-based metrics provide the clearest overview.  
 Shannon entropy can detect a larger spread in batch vs. Zero-Hop entropy,  
 however, the findings may strongly vary by the specific subset. It can  
 also be argued that entropy strongly depends on the choice of the number  
 of nearest neighbors. Likewise, the median pairwise distance and DRS  
 metrics show some ability to detect batch-correction, but due to the  
 strong dependency on the individual Zero-Hop the spread in values  
 may be large. The minimum separation clustering clearly shows when  
 a batch-correction can be considered effective. However, due to repeated  
 clustering, calculation of minimum separation number is computationally  
 far more expensive than distance-based metrics. A good mid-point between  
 classifier- and cluster-based evaluation are cluster-purity measures, which  
 show good resolution and manageable dependency on the Zero-Hop.

Data standardization, and marker gene elimination only had a  
 minor, insignificant (all Mann-Whitney U-Test p-values  $> 0.05$ )  
 effect when compared to the raw data, independent of the underlying  
 metric and data-set. Despite, markedly different results compared to  
 the uncorrected baseline, Harmony could not achieve sufficient batch-  
 correction characterized by poor performance in classifier and cluster-  
 based metrics throughout. We suggest that the large number of design  
 matrix elements and comparably strong batch-effect could lead to this  
 result. Importantly, *reComBat* achieved good scores throughout all  
 evaluation metrics for all data-sets (bulkRNAseq given in supplement),  
 whereas performance of other correction methods such as PC elimination,  
 scGen, and ComBat varied depending on data and metric. As expected,  
 singularity of the design matrix led to poor performance of ComBat  
 (microarray data), whereas bulkRNAseq data with a non-singular design

picture(0,0)(-35,0)(1,0)30 (0,-35)(0,1)30 picture

picture(0,0)(35,0)(-1,0)30 (0,-35)(0,1)30 picture

picture(0,0)(-35,0)(1,0)30 (0,35)(0,-1)30 picture

picture(0,0)(35,0)(-1,0)30 (0,35)(0,-1)30 picture

reComBat

5

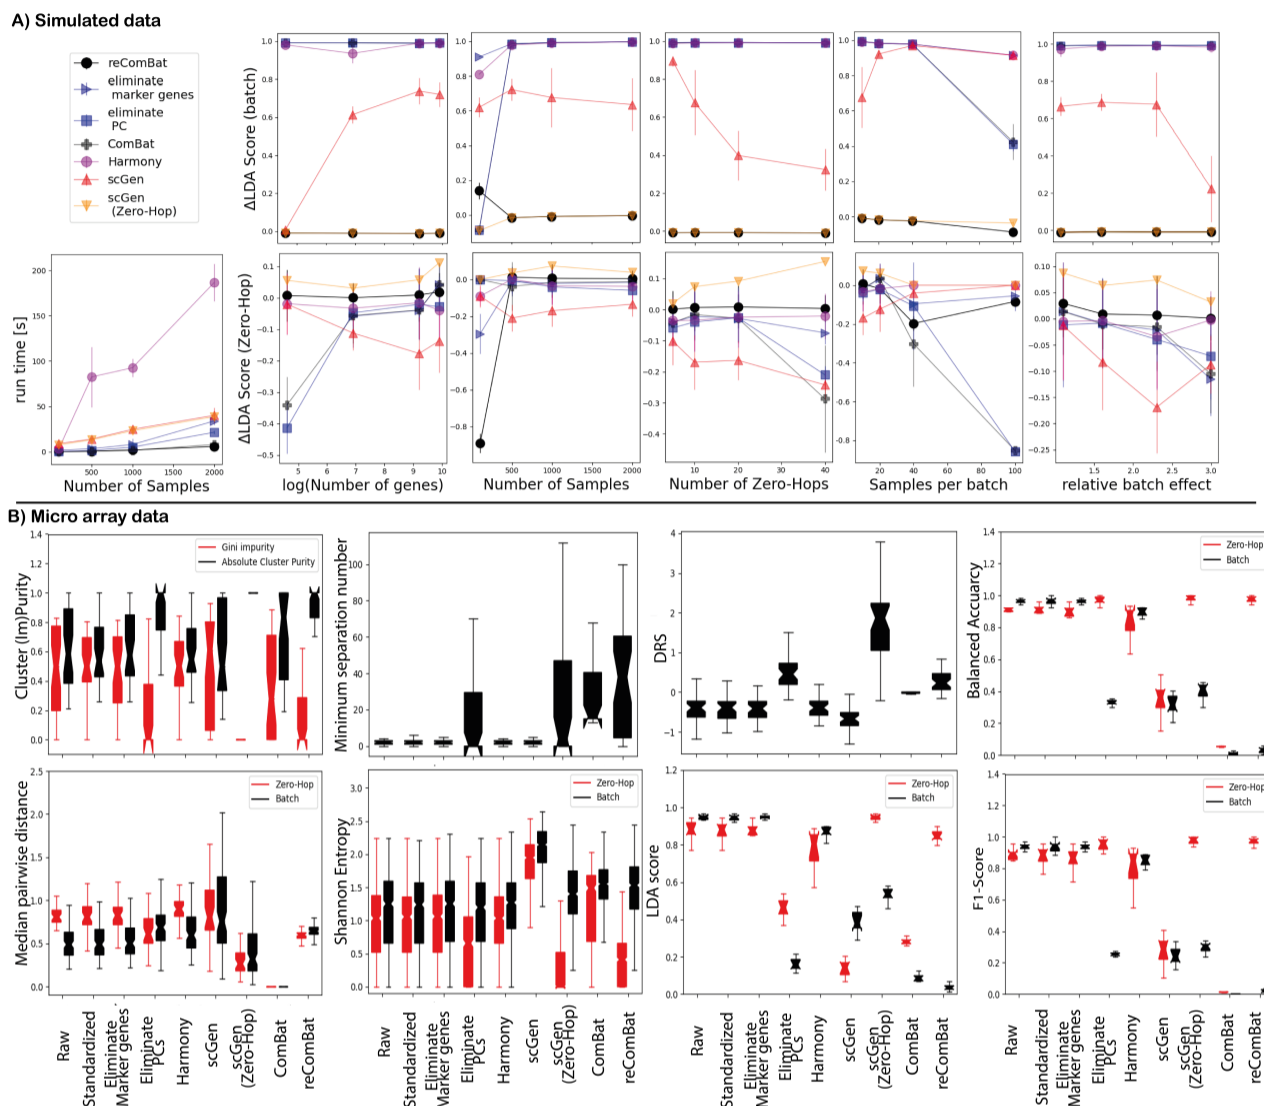

**Fig. 2.** A) Overview over results based on different simulated data-sets scored in terms of LDA score difference to ground truth for batch and Zero-Hops. Results represent mean values and standard deviations over 10 independent repeats. B) Evaluation metrics scoring the impact of batch-effects by evaluating the variety of different batches and/or Zero-Hops of the (un-) corrected microarray dataset. Box plots represent the lower and upper quartiles (box) together with the median (central dents) and full range (whiskers) over all samples, clusters, or Zero-Hops depending on the relevant metric. LDA scores and LR classification performance are reported over ten cross validation folds.

283 matrix achieved the best results for this method. For scGen it was key to 300  
 284 provide information on Zero-Hops as labels to the algorithm (scGen(Zero- 301  
 285 Hop)), whereas simply relying on design matrix covariates led to poor 302  
 286 correction. 303

### 3.5.1 Characterization of the harmonized microarray data-set 304

287 305  
 288 In order to preclude overcorrection (Zindler *et al.*, 2020) in the absence 306  
 289 of ground truth, we demonstrate that biologically meaningful expression 307  
 290 profiles are retained after batch-correction. As representative examples 308  
 291 we analyzed data subsets by oxygenation status, culture medium richness, 309  
 292 growth phase, or clinical vs. laboratory PA strains in our microarray 310  
 293 data-set (supplement G). We identify Zero-Hop marker genes driving 311  
 294 the differences between selected pairwise comparisons and assess their 312  
 295 relevance to underlying biological pathways. Pathways previously known 313  
 296 to be important in the relevant culture conditions were identified. For 314  
 297 instance, when comparing standard to hypoxic conditions, we find that 315  
 298 genes involved in aerotaxis (Hong *et al.*, 2004), Fe-S cluster biogenesis  
 299 (Romsang *et al.*, 2015) and iron acquisition ((Glanville *et al.*, 2021;

Hannauer *et al.*, 2012) are major drivers of differences. When comparing  
 cultures in exponential to stationary phase under hypoxia conditions,  
 genes involved in pyoverdinin (Drake *et al.*, 2007; Vandendende *et al.*, 2004)  
 and pyochelin (Ankenbauer and Quan, 1994; Reimmann *et al.*, 2001)  
 biosynthesis and transport, iron starvation (Alontaga *et al.*, 2009; Hassett  
*et al.*, 1997; Zhao and Poole, 2000) and quorum sensing (Kim *et al.*, 2012)  
 were relevant. Finally, for a comparison between the laboratory strain  
 PAO1 vs. clinical isolates we find cup genes (PA4081-PA4084, PA0994)  
 that are involved in motility and attachment and with this in biofilm  
 formation (Ruer *et al.*, 2007). This indicates a difference in attachment  
 between those strains that might be coming from the environment the  
 strains have adapted to grow in (laboratory vs. patient). In all cases, a large  
 amount of hypothetical genes of unknown function also flagged up - an  
 expected observation as roughly two thirds of the genes encoded in the PA  
 genome have an unknown function. The harmonized data-set hence serves  
 for hypothesis generation motivating further (experimental) validation.

picture(0,0)(-35,0)(1,0)30 (0,-35)(0,1)30 picture

picture(0,0)(35,0)(-1,0)30 (0,-35)(0,1)30 picture

picture(0,0)(-35,0)(1,0)30 (0,35)(0,-1)30 picture

picture(0,0)(35,0)(-1,0)30 (0,35)(0,-1)30 picture

## 4 Discussion

Public databases play an increasingly important role for data-driven meta-analysis in computational biology. Despite great efforts to harmonize data collection, considerable, yet unavoidable, biological/technical variation may mask true signal if data are pooled from several sources. To draw generalizable conclusions from agglomerated data, it is essential to correct such batch-effects in a setting where overlapping samples, or standardized controls, are unavailable. When large numbers of (> 20) batches coincide with desired biological variation, a range of standard batch-correction algorithms are inapplicable. We would like to stress that this evaluation scenario greatly differs from previously analyzed batch-correction settings where comparably few (2-5) batches with large number of overlapping samples were included, or comparably small batch-effects within a single study were corrected (Tran *et al.*, 2020). A key assumption of meta-analysis of published data is the coincidence of "batch" with "study". Given the substantial manual data curation to extract relevant design matrix information for experimental data the variety of data types (microarray, bulkRNAsq) and organisms (PA) assessed in addition to simulated data was limited. *reComBat* is a simple yet effective, means of mitigating highly correlated experimental conditions through regularization and we compared various elastic net regularization strengths for the purpose of meta analysis based on large-scale public data. We note that given the large number of batch-correction methods available, we only included representative examples for key concepts, including deep, non-linear models (scGen), Harmony, marker gene and PC elimination to benchmark our linear empirical Bayes method.

In case of a singular design matrix *reComBat* outperformed standard approaches, including data standardization, PC and marker gene elimination, Harmony, and scGen if no additional information regarding the evaluation endpoints (here Zero-Hops) was given to either of the methods. We demonstrate not only the superiority of *reComBat* compared to these baselines but, by providing a large variety of evaluation metrics, also give a notion of overall performance.

Importantly, in any large-scale meta-analysis setting, a ground truth is unavailable. Here, biological validation is essential prior to hypothesis generation and we demonstrate this for *reComBat*. Due to this fact we excluded some popular deep models (e.g. normAE(Rong *et al.*, 2020), AD-AE (Dincer *et al.*, 2020)) from this study as they only provide latent representation rather than direct correction at gene expression level. These methods would likely provide good batch-correction, however, downstream analysis via e.g. differential gene expression is impossible. There is also growing concern that batch-correction, particularly deep models, may overcorrect and remove biological signal. Although synthetic data addresses this challenge, algorithm performance varies between use-cases and the risk of overcorrection persists. We demonstrate this based on scGen(Zero-Hop) in our benchmark. Both scGen and Harmony (in the published python packages) do not allow for a separation of batch-correction training and validation to test for overfitting by cross-validation - *reComBat* indeed could be used in a cross-validation setting. Notably, in case of e.g. large-scale single cell RNA sequencing, the situation may in fact be favorable for nonlinear approaches - which is not the setting of interest here.

It was possible to show that *reComBat* retained biologically meaningful target pathways identified in a literature-based validation. By mining the harmonized data-set, we can now perform comparisons that have, to the best of our knowledge, never been directly performed before for the purpose of hypothesis generation. For instance, when we compare growth in LB with growth in media that have fewer nutrients, we find that several nutrient (Bains *et al.*, 2012; Ball *et al.*, 2002; Faure *et al.*, 2014; Jones *et al.*, 2021; Lewenza *et al.*, 2011; Quesada *et al.*, 2016) and metal (Alontaga *et al.*, 2009; Merriman *et al.*, 1995) uptake pathways are

deferentially regulated. Experimental validation of the proposed findings is key in confirming information on the underlying biological mechanisms.

With >5000 citations ComBat is one of the most popular batch-correction methods today applied to a large variety of data types and organisms (Wachinger *et al.*, 2021). In this study we showed how an adaptation of this popular algorithm can drastically increase its usability. ComBat benefits from low computational cost, rigorous underlying theory, interpretability, and is easy to apply in practice. We specifically want to recommend *reComBat* in a setting of comparably strong batch-effects and diverse experimental designs as are frequently observed within publicly sourced data from different laboratories. We acknowledge the small methodological differences between ComBat and *reComBat* but stress the importance of this adaptation to make a well-established method suitable for large-scale public data integration. By publishing *reComBat* as a python package<sup>1</sup> our method is readily available to the community. We also make the harmonized data-sets with their metadata available to the wider research community.<sup>2</sup>

## 5 Conclusion

We have addressed the challenge of harmonizing large, and highly diverse public data for downstream meta-analysis. Aiming at high community acceptance and a computationally efficient solution, we extend the well-established ComBat algorithm through the addition of regularization. We evaluate our novel algorithm on simulated, and public microarray and bulkRNAsq data. A variety of evaluation metrics attest comparable, or superior correction of batch-effects as established baseline models. Our analysis constitutes a proof of principle to motivate and enable further large-scale meta-analyses.

## Funding

This project was supported by the National Center of Competence in Research AntiResist funded by the Swiss National Science Foundation (grant number 51NF40\_180541) and funded in part by the Alfred Krupp Prize for Young University Teachers of the Alfred Krupp von Bohlen und Halbach-Stiftung (K.B.).

## References

- Alontaga, A. Y., Rodriguez, J. C., Schönbrunn, E., Becker, A., Funke, T., Yukl, E. T., Hayashi, T., Stobaugh, J., Moëne-Loccoz, P., and Rivera, M. (2009). Structural characterization of the hemophore HasAp from *Pseudomonas aeruginosa*: NMR spectroscopy reveals protein-protein interactions between Holo-HasAp and hemoglobin. *Biochemistry*, **48**(1), 96–109.
- Alter, O., Brown, P. O., and Botstein, D. (2000). Singular value decomposition for genome-wide expression data processing and modeling. *Proceedings of the National Academy of Sciences of the United States of America*, **97**(18), 10101–6.
- Andersson, D. I., Balaban, N. Q., Baquero, F., Courvalin, P., Glaser, P., Gophna, U., Kishony, R., Molin, S., and Tønjum, T. (2020). Antibiotic resistance: turning evolutionary principles into clinical reality. *FEMS Microbiology Reviews*, **44**(2), 171–188.
- Ankenbauer, R. G. and Quan, H. N. (1994). FptA, the Fe(III)-pyochelin receptor of *Pseudomonas aeruginosa*: a phenolate siderophore receptor homologous to hydroxamate siderophore receptors. *Journal of bacteriology*, **176**(2), 307–19.
- Bains, M., Fernández, L., and Hancock, R. E. W. (2012). Phosphate starvation promotes swarming motility and cytotoxicity of *Pseudomonas aeruginosa*. *Applied and environmental microbiology*, **78**(18), 6762–8.
- Ball, G., Durand, E., Lazdunski, A., and Filloux, A. (2002). A novel type II secretion system in *Pseudomonas aeruginosa*. *Molecular microbiology*, **43**(2), 475–85.
- Barrett, T., Wilhite, S. E., Ledoux, P., Evangelista, C., Kim, I. F., Tomashevsky, M., Marshall, K. A., Phillippy, K. H., Sherman, P. M., Holko, M., Yefanov, A., Lee, H., Zhang, N., Robertson, C. L., Serova, N., Davis, S., and Soboleva, A. (2013). NCBI GEO: archive for functional genomics data sets—update. *Nucleic acids research*, **41**(Database issue), D991–5.

<sup>1</sup> <https://github.com/BorgwardtLab/reComBat>

<sup>2</sup> <https://github.com/BorgwardtLab/batchCorrectionPublicData>

picture(0,0)(-35,0)(1,0)30 (0,-35)(0,1)30 picture

picture(0,0)(35,0)(-1,0)30 (0,-35)(0,1)30 picture

picture(0,0)(-35,0)(1,0)30 (0,35)(0,-1)30 picture

picture(0,0)(35,0)(-1,0)30 (0,35)(0,-1)30 picture

reComBat

7

- 436 Chazarra-Gil, R., van Dongen, S., Kiselev, V. Y., and Hemberg, M. (2021). Flexible  
437 comparison of batch correction methods for single-cell rna-seq using batchbench.  
438 *Nucleic acids research*, **49**(7), e42–e42. 512
- 439 Čuklina, J., Lee, C. H., Williams, E. G., Sajic, T., Collins, B. C., Rodríguez Martínez,  
440 M., Sharma, V. S., Wendt, F., Goetze, S., Keele, G. R., Wollscheid, B., Aebbersold,  
441 R., and Pedrioli, P. G. A. (2021). Diagnostics and correction of batch effects in  
442 large-scale proteomic studies: a tutorial. *Molecular Systems Biology*, **17**(8). 516
- 443 Dincer, A. B., Janizek, J. D., and Lee, S.-I. (2020). Adversarial deconfounding  
444 autoencoder for learning robust gene expression embeddings. *Bioinformatics*,  
445 **36**(Supplement\_2), i573–i582. 519
- 446 Drake, E. J., Cao, J., Qu, J., Shah, M. B., Straubinger, R. M., and Gulick, A. M.  
447 (2007). The 1.8 Å Crystal Structure of PA2412, an MbH-like Protein from the  
448 Pyoverdine Cluster of *Pseudomonas aeruginosa*. *Journal of Biological Chemistry*,  
449 **282**(28), 20425–20434. 523
- 450 Edgar, R., Domrachev, M., and Lash, A. E. (2002). Gene Expression Omnibus: NCBI  
451 gene expression and hybridization array data repository. *Nucleic acids research*,  
452 **30**(1), 207–10. 526
- 453 Faure, L. M., Garvis, S., de Bentzmann, S., and Bigot, S. (2014). Characterization of  
454 a novel two-partner secretion system implicated in the virulence of *Pseudomonas*  
455 *aeruginosa*. *Microbiology (Reading, England)*, **160**(Pt 9), 1940–1952. 529
- 456 Ghahramani, A., Watt, F. M., and Luscombe, N. (2018). Generative adversarial  
457 networks simulate gene expression and predict perturbations in single cells.  
458 *Preprint at bioRxiv*. 532
- 459 Gil-Gil, T., Ochoa-Sánchez, L. E., Baquero, F., and Martínez, J. L. (2021). Antibiotic  
460 resistance: Time of synthesis in a post-genomic age. *Computational and Structural*  
461 *Biotechnology Journal*, **19**, 3110–3124. 535
- 462 Glanville, D. G., Mullineaux-Sanders, C., Corcoran, C. J., Burger, B. T., Imam,  
463 S., Donohue, T. J., and Ulijasz, A. T. (2021). A High-Throughput Method for  
464 Identifying Novel Genes That Influence Metabolic Pathways Reveals New Iron  
465 and Heme Regulation in *Pseudomonas aeruginosa*. *mSystems*, **6**(1). 539
- 466 Hannauer, M., Braud, A., Hoegy, F., Ronot, P., Boos, A., and Schalk, I. J. (2012).  
467 The PvdRT-OpmQ efflux pump controls the metal selectivity of the iron uptake  
468 pathway mediated by the siderophore pyoverdine in *Pseudomonas aeruginosa*.  
469 *Environmental microbiology*, **14**(7), 1696–708. 543
- 470 Hassett, D. J., Howell, M. L., Sokol, P. A., Vasil, M. L., and Dean, G. E. (1997).  
471 Fumarate C activity is elevated in response to iron deprivation and in mucoid,  
472 alginate-producing *Pseudomonas aeruginosa*: cloning and characterization of  
473 *fumC* and purification of native *fumC*. *Journal of bacteriology*, **179**(5), 1442–51. 547
- 474 Hong, C. S., Shitashiro, M., Kuroda, A., Ikeda, T., Takiguchi, N., Ohtake, H., and  
475 Kato, J. (2004). Chemotaxis proteins and transducers for aerotaxis in *Pseudomonas*  
476 *aeruginosa*. *FEMS microbiology letters*, **231**(2), 247–52. 550
- 477 Johnson, W. E., Li, C., and Rabinovic, A. (2006). Adjusting batch effects in  
478 microarray expression data using empirical Bayes methods. *Biostatistics*, **8**(1),  
479 118–127. 553
- 480 Jones, R. A., Shropshire, H., Zhao, C., Murphy, A., Lidbury, I., Wei, T., Scanlan,  
481 D. J., and Chen, Y. (2021). Phosphorus stress induces the synthesis of novel  
482 glycolipids in *Pseudomonas aeruginosa* that confer protection against a last-resort  
483 antibiotic. *The ISME Journal*, **15**(11), 3303–3314. 557
- 484 Jumper, J., Evans, R., Pritzel, A., Green, T., Figurnov, M., Ronneberger, O.,  
485 Tunyasuvunakool, K., Bates, R., Žídek, A., Potapenko, A., et al. (2021). Highly  
486 accurate protein structure prediction with alphafold. *Nature*, **596**(7873), 583–589. 560
- 487 Kim, K.-Y., Kim, S. H., Ki, D. H., Jeong, H. J., Jeung, H.-C., Chung, S. H.,  
488 H. C., and Rha, S. Y. (2007). An attempt for combining microarray data sets by  
489 adjusting gene expressions. *Cancer research and treatment*, **39**(2), 74–81. 563
- 490 Kim, S.-K., Im, S.-J., Yeom, D.-H., and Lee, J.-H. (2012). AntR-mediated  
491 bidirectional activation of *antA* and *antR*, anthranilate degradative genes in  
492 *Pseudomonas aeruginosa*. *Gene*, **505**(1), 146–52. 566
- 493 Korsunsky, I., Millard, N., Fan, J., Slowikowski, K., Zhang, F., Wei, K., Baglaenko,  
494 Y., Brenner, M., Loh, P.-r., and Raychaudhuri, S. (2019). Fast, sensitive and  
495 accurate integration of single-cell data with Harmony. *Nature Methods*, **16**(12),  
496 1289–1296. 570
- 497 Kourou, K., Exarchos, K. P., Papanloukas, C., Sakaloglou, P., Exarchos, T., and  
498 Fotiadis, D. I. (2021). Applied machine learning in cancer research: A systematic  
499 review for patient diagnosis, classification and prognosis. *Computational and*  
500 *Structural Biotechnology Journal*, **19**, 5546–5555. 574
- 501 Lazar, C., Meganck, S., Taminiau, J., Steenhoff, D., Coletta, A., Molter, C., Weiss-  
502 Solís, D. Y., Duque, R., Bersini, H., and Nowé, A. (2012). Batch effect removal  
503 methods for microarray gene expression data integration: a survey. *Briefings in*  
504 *Bioinformatics*, **14**(4), 469–490. 578
- 505 Lewenza, S., Falsafi, R., Bains, M., Rohs, P., Stupak, J., Sprott, G. D., and Hancock,  
506 R. E. W. (2011). The *olsA* gene mediates the synthesis of an ornithine lipid in  
507 *Pseudomonas aeruginosa* during growth under phosphate-limiting conditions, but  
508 is not involved in antimicrobial peptide susceptibility. *FEMS microbiology letters*,  
509 **320**(2), 95–102. 583
- 584 Li, C. and Wong, W. H. (2001). Model-based analysis of oligonucleotide arrays:  
expression index computation and outlier detection. *Proceedings of the National*  
*Academy of Sciences of the United States of America*, **98**(1), 31–6.
- Lotfollahi, M., Wolf, F. A., and Theis, F. J. (2019). scGen predicts single-cell  
perturbation responses. *Nature methods*, **16**(8), 715–721.
- Malod-Dognin, N., Petschnigg, J., Windels, S. F. L., Povh, J., Hemingway, H.,  
Ketteler, R., and Pržulj, N. (2019). Towards a data-integrated cell. *Nature*  
*Communications*, **10**(1), 805.
- Merriman, T. R., Merriman, M. E., and Lamont, I. L. (1995). Nucleotide sequence of  
pvdD, a pyoverdine biosynthetic gene from *Pseudomonas aeruginosa*: PvdD has  
similarity to peptide synthetases. *Journal of bacteriology*, **177**(1), 252–8.
- Müller, C., Schillert, A., Röthmeier, C., Trégouët, D.-A., Proust, C., Binder, H.,  
Pfeiffer, N., Beutel, M., Lackner, K. J., Schnabel, R. B., Tirt, L., Wild, P. S.,  
Blankenberg, S., Zeller, T., and Ziegler, A. (2016). Removing Batch Effects from  
Longitudinal Gene Expression - Quantile Normalization Plus ComBat as Best  
Approach for Microarray Transcriptome Data. *PLOS ONE*, **11**(6), e0156594.
- Quesada, J. M., Otero-Asman, J. R., Bastiaansen, K. C., Civantos, C., and Llamas,  
M. A. (2016). The Activity of the *Pseudomonas aeruginosa* Virulence Regulator  
 $\sigma$ Vrel Is Modulated by the Anti- $\sigma$  Factor VreR and the Transcription Factor PhoB.  
*Frontiers in Microbiology*, **7**.
- Reimann, C., Patel, H. M., Serino, L., Barone, M., Walsh, C. T., and Haas,  
D. (2001). Essential PchG-dependent reduction in pyochelin biosynthesis of  
*Pseudomonas aeruginosa*. *Journal of bacteriology*, **183**(3), 813–20.
- Romsang, A., Duang-nkern, J., Wirathorn, W., Vattanaviboon, P., and Mongkolsuk,  
S. (2015). *Pseudomonas aeruginosa* IscR-Regulated Ferredoxin NADP(+)  
Reductase Gene (*fprB*) Functions in Iron-Sulfur Cluster Biogenesis and Multiple  
Stress Response. *PLOS ONE*, **10**(7), e0134374.
- Rong, Z., Tan, Q., Cao, L., Zhang, L., Deng, K., Huang, Y., Zhu, Z.-J., Li, Z.,  
and Li, K. (2020). NormAE: Deep Adversarial Learning Model to Remove Batch  
Effects in Liquid Chromatography Mass Spectrometry-Based Metabolomics Data.  
*Analytical chemistry*, **92**(7), 5082–5090.
- Ruer, S., Stender, S., Filloux, A., and de Bentzmann, S. (2007). Assembly of  
fimbrial structures in *Pseudomonas aeruginosa*: Functionality and specificity of  
chaperone-usher machineries. *Journal of Bacteriology*, **189**(9), 3547–3555.
- Shabalin, A. A., Tjelmeland, H., Fan, C., Perou, C. M., and Nobel, A. B.  
(2008). Merging two gene-expression studies via cross-platform normalization.  
*Bioinformatics (Oxford, England)*, **24**(9), 1154–60.
- Sims, A. H., Smethurst, G. J., Hey, Y., Okoniewski, M. J., Pepper, S. D., Howell, A.,  
Miller, C. J., and Clarke, R. B. (2008). The removal of multiplicative, systematic  
bias allows integration of breast cancer gene expression datasets – improving meta-  
analysis and prediction of prognosis. *BMC Medical Genomics*, **1**(1), 42.
- Stover, C. K., Pham, X. Q., Erwin, A. L., Mizoguchi, S. D., Warren, P., Hickey,  
M. J., Brinkman, F. L., Hufnagle, W. O., Kowalik, D. J., Lagrou, M., Garber, R. L.,  
Goltry, L., Tolentino, E., Westbrook-Wadman, S., Yuan, Y., Brody, L. L., Coulter,  
S. N., Folger, K. R., Kas, A., Larbig, K., Lim, R., Smith, K., Spencer, D., Wong, G.  
K.-S., Wu, Z., Paulsen, I. T., Reizer, J., Saier, M. H., Hancock, R. E. W., Lory, S.,  
and Olson, M. V. (2000). Complete genome sequence of *Pseudomonas aeruginosa*  
PAO1, an opportunistic pathogen. *Nature*, **406**(6799), 959–964.
- Tacconelli, E., Carrara, E., Savoldi, A., Harbarth, S., Mendelson, M., Monnet, D. L.,  
Pulcini, C., Kahlmeter, G., Kluytmans, J., Carmeli, Y., Ouellette, M., Outtersson,  
K., Patel, J., Cavaleri, M., Cox, E. M., Houchens, C. R., Grayson, M. L., Hansen,  
P., Singh, N., Theuretzbacher, U., Magrini, N., and WHO Pathogens Priority List  
Working Group (2018). Discovery, research, and development of new antibiotics:  
the WHO priority list of antibiotic-resistant bacteria and tuberculosis. *The Lancet*.  
*Infectious diseases*, **18**(3), 318–327.
- Tran, H. T. N., Ang, K. S., Chevrier, M., Zhang, X., Lee, N. Y. S., Goh, M., and  
Chen, J. (2020). A benchmark of batch-effect correction methods for single-cell  
RNA sequencing data. *Genome Biology*, **21**(1), 12.
- Vandenende, C. S., Vlasschaert, M., and Seah, S. Y. K. (2004). Functional  
characterization of an aminotransferase required for pyoverdine siderophore  
biosynthesis in *Pseudomonas aeruginosa* PAO1. *Journal of bacteriology*, **186**(17),  
5596–602.
- Wachinger, C., Rieckmann, A., Pölsterl, S., Initiative, A. D. N., et al. (2021). Detect  
and correct bias in multi-site neuroimaging datasets. *Medical Image Analysis*, **67**,  
101879.
- Yu, X., Abbas-Aghabazadeh, F., Chen, Y. A., and Fridley, B. L. (2021). *Statistical*  
*and Bioinformatics Analysis of Data from Bulk and Single-Cell RNA Sequencing*  
*Experiments*, pages 143–175. Springer US, New York, NY.
- Zhang, Y., Parmigiani, G., and Johnson, W. E. (2020). ComBat-seq: batch effect  
adjustment for RNA-seq count data. *NAR genomics and bioinformatics*, **2**(3),  
lqaa078.
- Zhao, Q. and Poole, K. (2000). A second *tonB* gene in *Pseudomonas aeruginosa* is  
linked to the *exbB* and *exbD* genes. *FEMS Microbiology Letters*, **184**(1), 127–132.
- Zindler, T., Frieling, H., Neyazi, A., Bleich, S., and Friedel, E. (2020). Simulating  
ComBat: how batch correction can lead to the systematic introduction of false

picture(0,0)(-35,0)(1,0)30 (0,-35)(0,1)30 picture

picture(0,0)(35,0)(-1,0)30 (0,-35)(0,1)30 picture

picture(0,0)(-35,0)(1,0)30 (0,35)(0,-1)30 picture

picture(0,0)(35,0)(-1,0)30 (0,35)(0,-1)30 picture

picture(0,0)(-35,0)(1,0)30 (0,-35)(0,1)30 picture

picture(0,0)(35,0)(-1,0)30 (0,-35)(0,1)30 picture
